# Supplementary material for: Anxiety Reduction and Improved Concentration in Schoolchildren through Wingwave® Coaching
Source: MDPI journal article supplement (doi:10.3390/children8121102), 2021-11-30
Supplement: s1 [file s1]

## **Supplements**

List of the 35 most frequently stated causes from the survey.

|                                   |                                                                                                                    |                                                               |                                                                    |                                                      |
|-----------------------------------|--------------------------------------------------------------------------------------------------------------------|---------------------------------------------------------------|--------------------------------------------------------------------|------------------------------------------------------|
| <b>Geräusche</b>                  | <b>Sich selbst ablenken<br/>(Ohrwurm, bestimmte<br/>Gedanken etc.)</b>                                             | <b>Stress</b>                                                 | <b>Nahende Zeugnisse</b>                                           | <b>Mitschüler</b>                                    |
| <b>Lautstärke, Lärm</b>           | <b>Witze</b>                                                                                                       | <b>Schmerz</b>                                                | <b>Im Mittelpunkt stehen</b>                                       | <b>Sitznachbar</b>                                   |
| <b>Reingerufe</b>                 | <b>Hausaufgaben (auch<br/>Gedanken daran)</b>                                                                      | <b>Schlechte Luft</b>                                         | <b>Rolle in der Klasse<br/>(z.B. KlassencLOWN,<br/>Tollpatsch)</b> | <b>Freund / Freundin</b>                             |
| <b>Unruhe</b>                     | <b>Klassenarbeit (auch<br/>Gedanken daran; „es<br/>kommt wieder das<br/>dran, was ich nicht<br/>gelernt habe“)</b> | <b>Hohe Erwartungen<br/>(der Lehrer, der Eltern<br/>etc.)</b> | <b>Streber</b>                                                     | <b>Lehrer</b>                                        |
| <b>Stille</b>                     | <b>Vokabeltest</b>                                                                                                 | <b>Eltern (getrennt,<br/>Stress, Erwartungen)</b>             | <b>verliebt sein</b>                                               | <b>Klasse<br/>(z.B. Größe)</b>                       |
| <b>Lachanfälle</b>                | <b>Farbe des Stifts der<br/>Lehrer bei Korrektur<br/>der Arbeit</b>                                                | <b>Geschwister</b>                                            | <b>Langeweile</b>                                                  | <b>Tische</b>                                        |
| <b>Ablenkung durch<br/>andere</b> | <b>Handy</b>                                                                                                       | <b>Fach (Sport, Englisch,<br/>Mathe etc.)</b>                 | <b>Sinnfrage<br/>(„wofür mache ich<br/>das hier?“)</b>             | <b>Material (Unterlagen,<br/>Hefte, Stifte etc.)</b> |

*Table S1. Means (M), Standard Deviations (SD), t-values (t), degrees of freedom (df) and p-values (p) of Bonferroni corrected t-tests for the baseline-values*

|                                     | <b>M</b> | <b>SD</b> | <b>t</b> | <b>df</b> | <b>p</b> |
|-------------------------------------|----------|-----------|----------|-----------|----------|
| <b>KLT-R total answers   T=0</b>    |          |           |          |           |          |
| Experimental group                  | 32.37    | 14.78     | 1.33     | 51        | > .99    |
| Control group                       | 37.78    | 14.57     |          |           |          |
| <b>KLT-R correct answers   T=0</b>  |          |           |          |           |          |
| Experimental group                  | 23.00    | 14.83     | 1.00     | 51        | > .99    |
| Control group                       | 26.96    | 13.43     |          |           |          |
| <b>AFS test anxiety   T=0</b>       |          |           |          |           |          |
| Experimental group                  | 9.13     | 3.98      | -2.22    | 51        | .186     |
| Control group                       | 6.61     | 4.25      |          |           |          |
| <b>AFS manifested anxiety   T=0</b> |          |           |          |           |          |
| Experimental group                  | 6.27     | 3.86      | -.84     | 51        | > .99    |
| Control group                       | 5.35     | 4.09      |          |           |          |
| <b>AFS dislike of school   T=0</b>  |          |           |          |           |          |
| Experimental group                  | 4.20     | 2.72      | -1.52    | 51        | .804     |
| Control group                       | 3.09     | 2.52      |          |           |          |
| <b>Subjective feeling   T=0</b>     |          |           |          |           |          |
| Experimental group                  | -2.32    | 3.34      | 2.84     | 51        | .042     |
| Control group                       | .41      | 3.65      |          |           |          |
